**Title:** Estimation of monkeypox spread in a non-endemic country considering contact tracing and self-reporting: a stochastic modeling study

**Running title:** Estimation of Monkeypox spread in a non-endemic country

**Authors:**

Youngsuk Ko<sup>1</sup>, Phd student

Renier Mendoza<sup>1,2</sup>, Associate Professor

Victoria May Mendoza<sup>1,2</sup>, Assistant Professor

Yubin Seo<sup>3</sup>, Assistant Professor

Jacob Lee<sup>3</sup>, Associate Professor

Eunok Jung<sup>1\*</sup>, Professor

**Affiliations:**

<sup>1</sup>Department of Mathematics, Konkuk University, Seoul, Korea

<sup>2</sup>Institute of Mathematics, University of the Philippines Diliman, Quezon City, Philippines

<sup>3</sup>Division of Infectious Disease, Department of Internal Medicine, Kangnam Sacred Heart Hospital, Hallym University College of Medicine, Seoul, Korea

**Grants:**

This paper is supported by the Korea National Research Foundation (NRF) grant funded by the Korean government (MEST) (NRF-2021M3E5E308120711). This paper is also supported by the Korea National Research Foundation (NRF) grant funded by the Korean government (MEST) (NRF-2021R1A2C100448711).

**Address for correspondence:**

Eunok Jung

Konkuk University, 120 Neungdong-ro, Gwangjin-gu, Seoul 05029. KOREA

E-mail: [junge@konkuk.ac.kr](mailto:junge@konkuk.ac.kr)

## **Abstract**

### **Background**

In May 2022, monkeypox started to spread in non-endemic countries. After the number of confirmed cases reached more than 16,000 in July, the World Health Organization declared the highest alert over the outbreak.

### **Methods**

To investigate the effects of contact tracing and self-reporting of primary cases in the local community, a stochastic model is developed. A delay simulation algorithm based on Gillespie's stochastic chemical kinetics is used to quantify the number of infections, contacts made by the infectors, and duration from the arrival of the primary case until the detection of the index case (and until there are no more local infections), under various scenarios.

### **Results**

We found that if the primary case does not self-report, taking into account a population of 10,000, the average number of infections could range from 30 to 67, while the number of contacts made by infectors could range from 221 to 498. On the other hand, if the primary case self-reports, the average number of infections and contacts could range from 5 to 7 and 40 to 52, respectively. The average duration from the primary case arrival until the first index case detection (or until there are no more local infections) ranged from 8 to 10 days (18 to 21 days) if the primary case does not self-report, and approximately 3 days (8 days) if the primary case self-reports. Moreover, if the number of close contacts per day is doubled in our simulation settings, then the number of infections could increase by 53%.

### **Conclusion**

The number and duration of the infections are strongly affected by the self-reporting behavior of the primary case and the delay in the detection of the index case. Our study emphasizes the importance of border control, which aims to immediately detect the primary case before secondary infections occur.

## **Introduction**

Monkeypox is a zoonotic disease caused by the monkeypox virus. Two possible means of transmission are animal-to-human and human-to-human. Animal-to-human transmission, also known as zoonotic transmission, is possible upon contact with or consumption of an infected natural host animal, such as rats, squirrels, and prairie dogs.<sup>1,2</sup> Human-to-human transmission can be caused by respiratory droplets or contact with lesions and bodily fluids. Contact with contaminated materials such as clothing, beddings, or eating utensils can also cause infections.<sup>3</sup> The signs and symptoms of monkeypox are similar to smallpox but are less severe. In the current outbreak, symptoms are described as flu-like, followed by a rash starting in the genital and perianal areas, which may or may not spread to the other parts of the body.<sup>4,5</sup>

The monkeypox virus was first reported in 1970.<sup>6</sup> It is commonly found in Central and West Africa and occasionally identified in other countries.<sup>1</sup> If undetected, transmission in non-endemic countries is possible, triggering outbreaks.<sup>7,8</sup> Since May 2022, an unprecedented outbreak of human monkeypox cases has been observed in Australia and several countries in Europe and North America.<sup>9</sup> On July 23, World Health Organization declared a global health emergency as the number of confirmed cases reached more than 16,000.<sup>10</sup> As of August 11, 2022, United States recorded the highest number of cumulative cases (10,360), followed by Spain (5,482) and Germany (3,025).<sup>11</sup>

The basic reproductive number of monkeypox was estimated to be 2.13 (uncertainty bounds 1.46–2.67).<sup>12</sup> Although it is less than the basic reproductive number of COVID-19, monkeypox has a potential to become an epidemic.<sup>13</sup> Hence, understanding the transmission dynamics of the disease is essential to mitigate its spread. There are only a few works on monkeypox transmission models.<sup>14,15,16,17,18</sup> These models include both types of transmissions

in endemic regions. However, since the disease had spread in non-endemic countries where natural animal hosts are not present, these models may not be applicable.

The social media coverage about the monkeypox spread directly or indirectly generates racist and homophobic stereotypes that worsen stigma.<sup>9</sup> Stigma can discourage people from seeking medical help, which may impede the efforts in identifying cases.<sup>19,20</sup> Self-reporting plays an important role in mitigating the spread of infections. Once a suspected case is identified, the WHO recommends that contact identification and contact tracing be initiated.<sup>21</sup> In this study, we are interested in understanding the dynamics of monkeypox infection in non-endemic settings. Using a stochastic model, we would like to discuss the following relevant questions:

1. Upon the arrival of a primary case in a non-endemic country, how many infections may occur?<sup>22</sup>
2. Depending on when the index case is found, how many contacts would the infector have already made?
3. How long is the duration of the outbreak?
4. What happens if the primary case does not self-report?

In this study, we estimated the potential monkeypox outbreak in a non-endemic country using a stochastic modeling method. Contact tracing, which is a well-known nonpharmaceutical intervention, and the behavior of the primary case, whether self-reporting or not, are considered in our simulation study.

## Methods

A stochastic model that assumes a nondelayed Markovian frequency-dependent disease transmission and incorporates delayed non-Markovian reactions is developed. The flow diagram of the model is displayed in Figure 1. The transmission rate consists of the number of contacts per unit time ( $c$ ) and probability of successful disease transmission ( $p$ ).<sup>23</sup> Contact is made between infectors ( $I_1$  or  $I_2$ ) and susceptible hosts ( $S$ ), formulated as the term  $cS \frac{(I_1+I_2)}{N}$ , where  $N$  indicates the total population except isolated hosts ( $S + C + E + I_1 + I_2 + R$ ) and subscripts 1 or 2 denote self-reporting or non-self-reporting, respectively. Depending on  $p$ , a susceptible host who had contact with an infector can either be uninfected ( $C$ ) or in latent stage ( $E$ ). The probability that an infectee will later self-report is denoted by  $\rho$ .

When an infectee in the latent stage becomes an infector ( $I_1$  or  $I_2$ ), the host can spread the disease. If the infector self-reports ( $I_1$ ), then the host is isolated ( $Q_I$ ) and contact tracing events are generated once the case is confirmed. A certain proportion ( $e_c$ ) of hosts ( $C$ ,  $E$ ,  $I_1$ ,  $I_2$ ) who had contact with the confirmed host within contact survey time ( $t_{survey}$ , 14 days, assumed) will be traced. An infector in  $I_2$  will stay in  $I_2$  until the host is naturally recovered ( $R$ ), or until tracked and isolated. Note that contact tracing events are also generated if a traced host is infected ( $E$ ,  $I_1$ ,  $I_2$ ). A host in  $C$  can be traced and isolated ( $Q_C$ ) even if the host is not infected or go back so  $S$  after  $t_{survey}$ . We assumed the isolation time  $t_{iso}$  is 21 days.

Aggregating the values from Prem's study, the average number of contacts per day ( $c$ ) in Korea is estimated as 12.74 (3.20 household contacts, 9.54 else).<sup>24</sup> Combining these contacts with the probability of successful disease transmission through a household contact and other

contacts, 25.25% and 9.56%, respectively, the adjusted probability of successful disease transmission through a contact ( $p$ ) is estimated as 13.51%.<sup>25</sup> Denoting by  $c_{hh}$  and  $c_{other}$  ( $p_{hh}$  and  $p_{other}$ ) the daily number of (probability of infection through) household and other contacts, respectively, the probability of infection through a contact is calculated as follows,

$$p = \frac{c_{hh}}{c_{hh} + c_{other}} \times p_{hh} + \frac{c_{other}}{c_{hh} + c_{other}} \times p_{other}.$$

In our model, contact (resulting to non-infection or infection) is the only nondelayed reaction (Markovian, solid arrow line in Figure 1). The other reactions are delayed (Non-Markovian, dashed arrow). We set uniform distributions for delays that are uncertain but ranged (infectious period of non-self-reporting infector,  $t_{inf2}$ , 14 to 28 days) or assumed (contact tracing time,  $t_{trace}$ , 1 to 3 days).<sup>26,27</sup> Latent period ( $t_{lat}$ ) and self-report time ( $t_{inf1}$ ) are generated from log-normal distribution and aggregated from previous studies.<sup>28,29</sup> The average values of the latent period and self-report time are 8.5 and 2.96 days, respectively. We assumed that the delay for a host with monkeypox to self-report ( $t_{inf1}$ ) is similar to the period from symptom onset to diagnosis of a known case of COVID-19 exposure. The delays  $t_{survey}$  and  $t_{iso}$  are fixed to constant values.



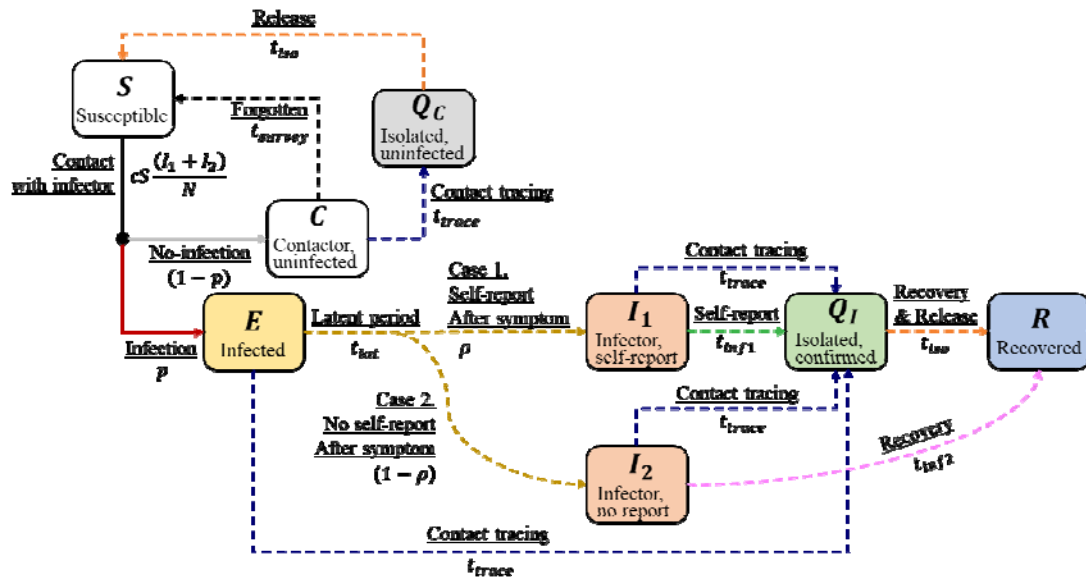

Figure 1. Flow diagram of the stochastic modeling. Note that arrows with solid lines indicate nondelayed (Markovian) reactions while arrows with dashed curves are delayed (non-Markovian) reactions.

Here, the definition of the primary case and index case are as follows.<sup>22</sup>

- ✓ Primary case: the person who brings the disease to a community
- ✓ Index case: the first patient identified by health authorities with the disease

Considering whether the primary case self-reports or not (initial condition of the simulation is  $I_1$  or  $I_2$ ), self-report rate of infectees in the local community ( $\rho$ , 0.5 or 1), and contact tracing coverage ( $e_c$ , 0.5 or 1), we set up eight scenarios, ran 10,000 simulations for each scenario, and observed the number of infections, contacts, duration of primary case arrival to index case detection (**PI**), and duration of primary case arrival to the end of the simulation (**P2**). End of the simulation means that all who were infected in the local community (except isolated) are removed, that is,  $E + I_1 + I_2 = 0$ . The exact stochastic simulation algorithm for systems with delays was adopted to express the delayed events. A detailed description of the algorithm, which was developed based on Gillespie's stochastic chemical kinetics, is presented in<sup>30</sup>. We simply set the population size as 10,000.

## Results

The different scenarios are labeled *S-1* to *S-8*, according to the setting of the simulation. The setting of each scenario and corresponding simulation results, illustrated as boxplots, are shown in Figure 2. Note that *P1* and *P2* denote the duration of the primary case arrival to index case detection and end of the simulation, respectively. Numerical results are summarized in Table 1.

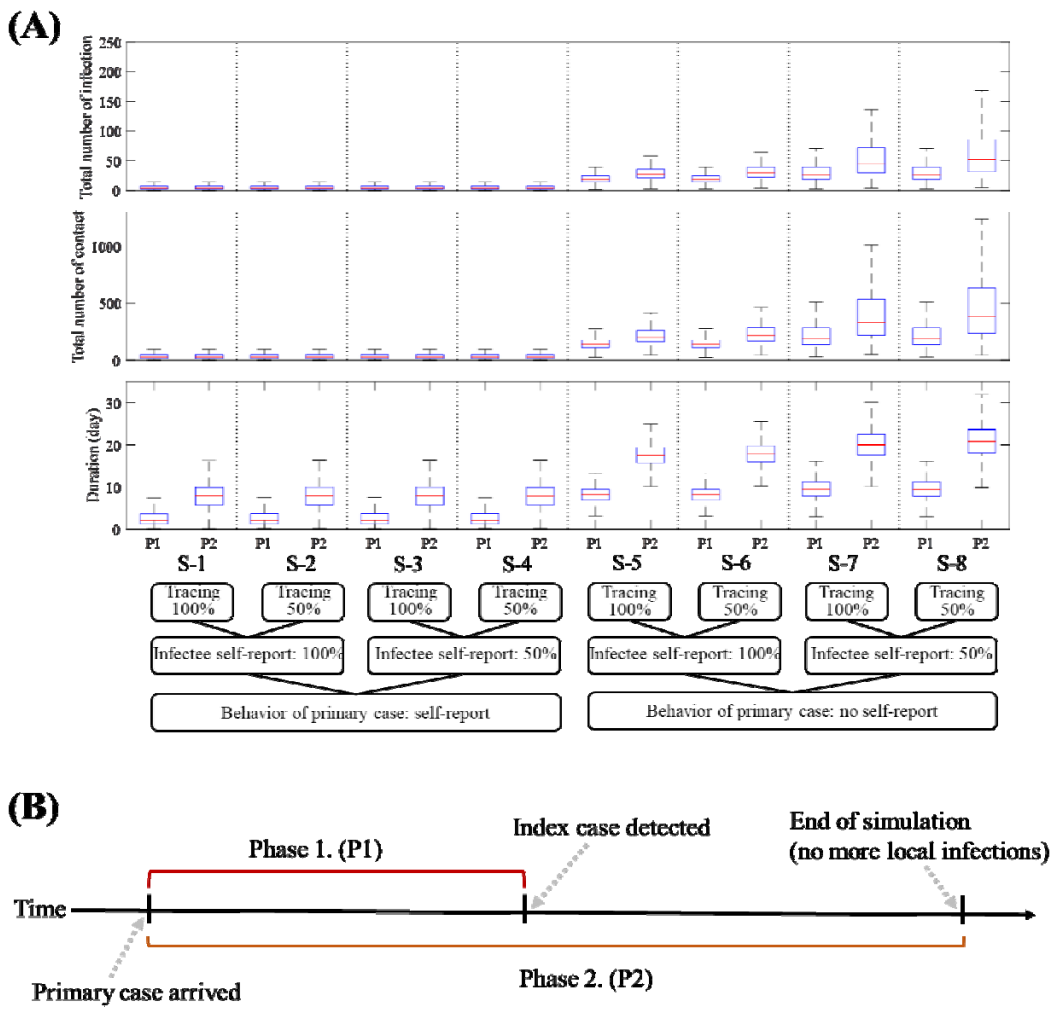

Figure 2. Scenario-based simulation results. (A) Boxplots showing the total number of infections, the total number of contacts, and duration of *P1* and *P2* corresponding to each scenario. (B) Timeline illustrating the two phases *P1* and *P2*.

Table 1. Simulation results of scenarios.

| Time phase                                 | What a primary case do | Self-report rate of infectee | Contact trace coverage | Number of infection |        |          | Number of contact |        |            | Time duration (day) |        |               |
|--------------------------------------------|------------------------|------------------------------|------------------------|---------------------|--------|----------|-------------------|--------|------------|---------------------|--------|---------------|
|                                            |                        |                              |                        | Mean                | Median | 95% C.I. | Mean              | Median | 95% C.I.   | Mean                | Median | 95% C.I.      |
| From primary case arrival to index case    | Self-report            | 100%                         | 100%                   | 4.97                | 3      | [0,19]   | 36.65             | 26     | [4,134]    | 2.67                | 2      | [0.37,8.16]   |
|                                            |                        |                              | 50%                    | 5.04                | 3      | [0,20]   | 37.15             | 26     | [3,140]    | 2.68                | 2      | [0.36,8.32]   |
|                                            |                        | 50%                          | 100%                   | 5.43                | 3      | [0,25]   | 40.35             | 26     | [3,178]    | 2.77                | 2      | [0.37,9.06]   |
|                                            |                        |                              | 50%                    | 5.4                 | 3      | [0,24]   | 39.88             | 26     | [4,175]    | 2.74                | 2      | [0.36,8.98]   |
|                                            | No self-report         | 100%                         | 100%                   | 19.76               | 18     | [8,40]   | 146.23            | 136    | [68,283]   | 8.22                | 8      | [4.68,12.19]  |
|                                            |                        |                              | 50%                    | 19.59               | 18     | [8,39]   | 145.31            | 136    | [67,275]   | 8.2                 | 8      | [4.71,12.23]  |
|                                            |                        | 50%                          | 100%                   | 30.97               | 26     | [9,83]   | 229.2             | 191    | [77,602]   | 9.55                | 9      | [5.17,14.67]  |
|                                            |                        |                              | 50%                    | 30.94               | 26     | [9,81]   | 228.46            | 190    | [77,590]   | 9.55                | 9      | [5.23,14.7]   |
| From primary case arrival to situation end | Self-report            | 100%                         | 100%                   | 5.39                | 3      | [0,25]   | 39.77             | 26     | [4,173]    | 7.79                | 8      | [0.45,16.08]  |
|                                            |                        |                              | 50%                    | 5.6                 | 3      | [0,27]   | 41.32             | 26     | [3,191]    | 7.81                | 8      | [0.45,16.74]  |
|                                            |                        | 50%                          | 100%                   | 6.69                | 3      | [0,40]   | 49.62             | 26     | [3,286]    | 8.06                | 8      | [0.45,19.23]  |
|                                            |                        |                              | 50%                    | 7.03                | 3      | [0,46]   | 51.89             | 26     | [4,323]    | 8.07                | 8      | [0.44,19.88]  |
|                                            | No self-report         | 100%                         | 100%                   | 29.86               | 27     | [12,62]  | 221.2             | 201    | [105,447]  | 17.56               | 18     | [12.7,22.76]  |
|                                            |                        |                              | 50%                    | 31.61               | 29     | [12,66]  | 234.65            | 214    | [106,476]  | 17.84               | 18     | [12.6,23.36]  |
|                                            |                        | 50%                          | 100%                   | 57.48               | 45     | [14,172] | 425.49            | 332    | [118,1260] | 20.07               | 20     | [13.4,27.39]  |
|                                            |                        |                              | 50%                    | 67.39               | 52     | [15,209] | 498.01            | 385    | [119,1533] | 20.92               | 21     | [13.56,28.68] |

We observe that if the primary case does not self-report (*S-5* to *S-8*), then the simulations are worse than in the scenarios where the primary case self-reports (*S-1* to *S-4*). The average number of infections, contacts, and duration from primary case arrival to the end of simulation for scenarios *S-1* to *S-4* are 6.22, 45.99, and 7.94 days, respectively, which are 7.49, 7.50, and 2.4 times higher than for scenarios *S-5* to *S-8* (46.58, 344.75, and 19.10 days, respectively).

Considering the number of contacts per day and the probability of successful disease transmission, the expected number of infections per day is 1.72 (Number of contacts per day  $\times$  probability of infection by contact). This means that in scenarios *S-5* to *S-8*, where the primary case is not the index case, the primary case would already have made dozens of secondary infections until the index case is detected, which takes (incubation period) + (self-report time) days. The average duration of *PI* in scenarios *S-1* to *S-4* is 1 to 2 days since the primary case is most likely identical to the index case, while in *S-5* to *S-8*, it takes 7 to 9 days on average until index case is detected.

Figure 3 shows the probability density of the total number of infections and contacts, and durations of *PI* and *P2* for scenarios *S-3*, *S-4*, and *S-5*. Although *S-5* is set to have 100% coverage for contact tracing and self-reporting rate of infectees, it shows the worst outcomes among the three scenarios. We observe skewed distributions for *S-3* and *S-4*, suggesting that the situation would most likely be small scale. The average number of infections until the end of the simulation in *S-5* (29.86) is approximately more than four times higher than in *S-3* or *S-4* (6.69 or 7.03, respectively). Scenario *S-4* shows a slightly higher average number of infections compared to *S-3* due to the reduced contact tracing coverage.

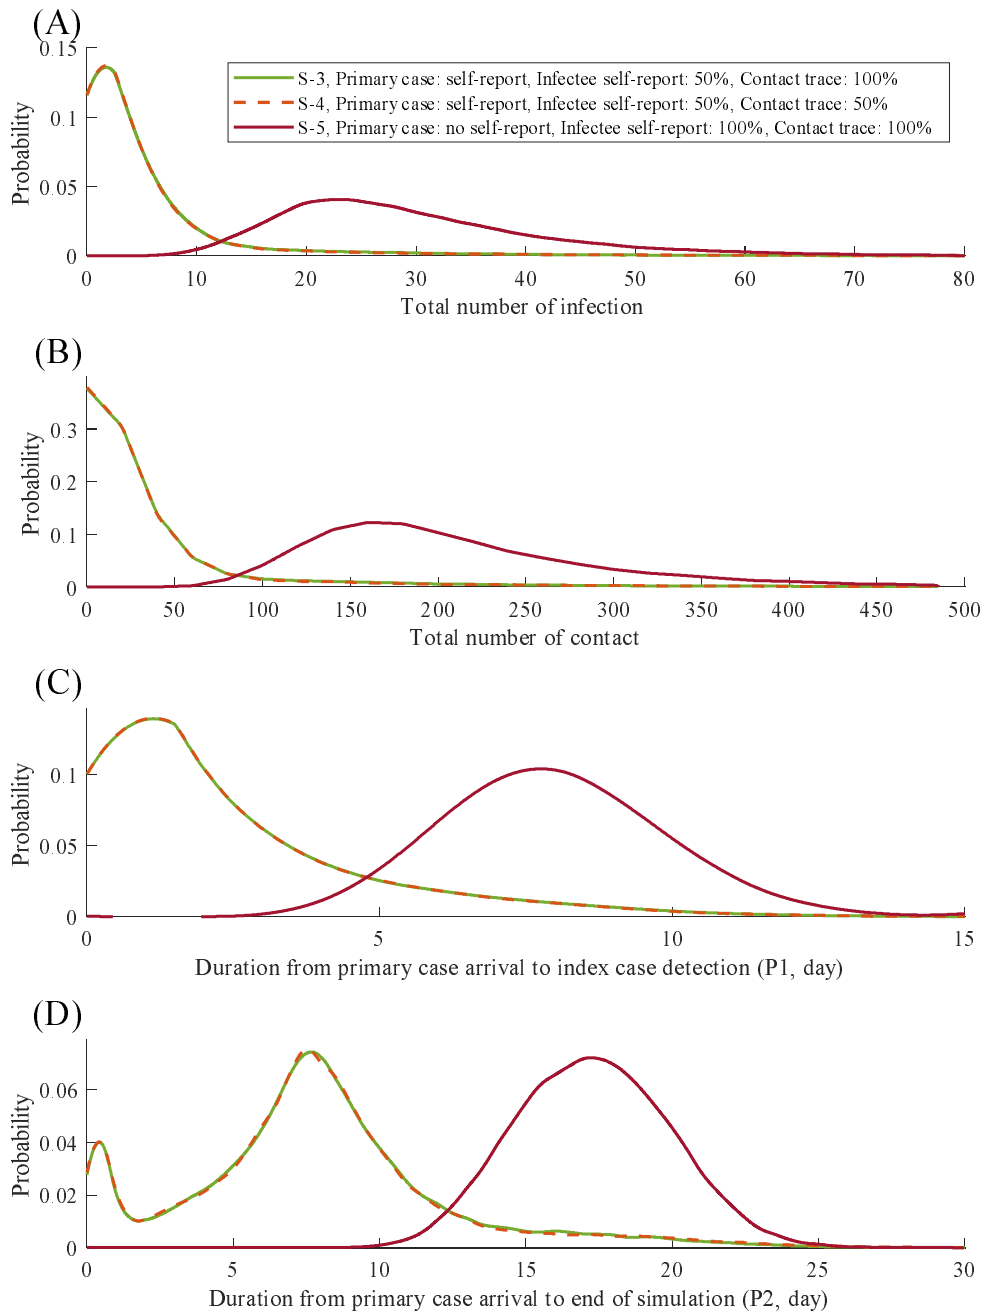

Figure 3. Distribution of the simulation results of three scenarios. (A) Total number of infections. (B) Total number of contacts. (C) Duration from primary case arrival to the identification of index case. (D) Duration from primary case arrival to end of the simulation.

To investigate what happens if the average number of household contacts is higher, such as in a potential super-spreader event, we considered doubling the number of household contacts for scenarios S-1 and S-5, which are denoted by **S-1x** and **S-2x**. The plots in Figure 4 show the simulation results. As the number of household contacts doubled from 3.20 to 6.41, the average number of contacts and probability of disease transmission by contact increased to 15.94% and 15.87% (from 12.74 and 13.51%), respectively. The average number of infections and contacts of S-1x (S-5x) increased by 53.11% (46.67%) and 30.41% (24.72%), respectively. There were no significant changes in the durations of **PI** and **P2**.



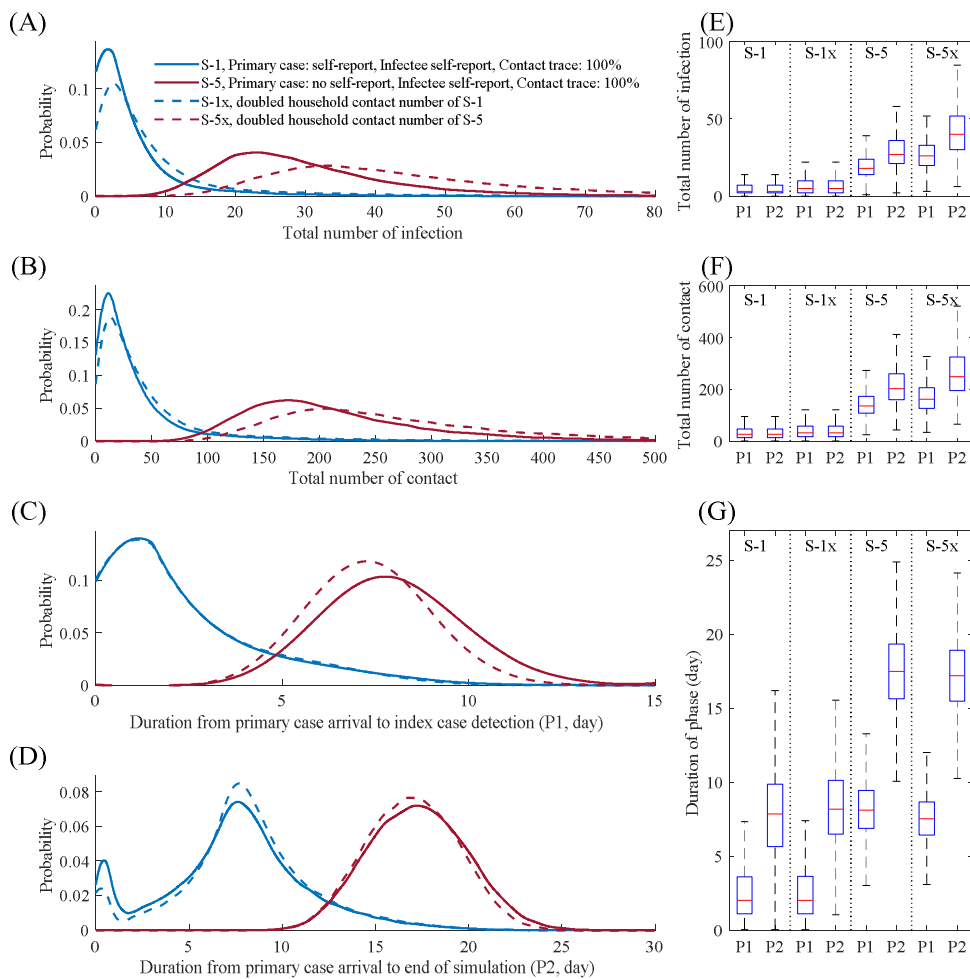

Figure 4. Distribution profile of simulation results if the number of household contacts is doubled. (A) Total number of infections. (B) Total number of contacts. (C) Duration from primary case arrival to the identification of the index case. (D) Duration from primary case arrival to end of the simulation. (E) Boxplot of (A), including the phase from primary case arrival to the identification of the index case. (F) Boxplot of (B), including the phase from primary case arrival to the identification of the index case. (G) Boxplot of (C) and (D).

## Discussion

In Korea, the first monkeypox case had self-reported right after arrival.<sup>31</sup> As a result, there were no recorded secondary infections, which would be similar to a ‘good’ scenario (*S-1* to *S-4*) in our simulation setting. However, if the primary case was in the incubation stage and did not self-report after symptom onset, then hundreds of contacts and dozens of infections could be expected to have occurred in the local community once the index case was found. In this scenario, more efforts would have been needed to control the disease.

We investigated the effects of doubling the number of household contacts per day (which can be referred to as close contact). The results illustrated in Figure 4 warn of the potential risk of a significant increase in the number of monkeypox infections when unreported initial cases contacted more people, or if the group the primary case belongs to has more close contacts.

## **Strengths and limitations**

Our simulation results may guide the healthcare authorities in the planning and management of possible monkeypox outbreaks in non-endemic countries. For instance, it was shown that the delay in the detection of an index case is directly related to the number of contacts made, and knowing the scale of contact tracing efforts to be performed is crucial in managing manpower once the index case is found. In the simulations, we have used the average number of contacts per day suited for Korea but this can easily be adapted to other countries' contact patterns. If the average household size is bigger or the number of contacts is more, then the probability of disease transmission increases.

There were limitations to our study. Contact tracing was applied to the model through a randomized sampling and not based on an individual's network. Also, we assumed that contact tracing is perfect, that is, all infectors are found if 100% coverage is in effect. The probability of successful infection after contact might be overestimated since the concept of contact from the cited literature might differ from the definition of contact used in this study. Finally, we did not consider sexual contact in this study due to the limit of data. These limitations will be considered in the next study.

## **Conclusions**

In this study, the potential risk of monkeypox spread in a non-endemic country was studied using a stochastic model. We simulated outbreaks caused by a primary case that either self-reports or not and considered different coverage rates of contact tracing and self-reporting rates of infectees.

Stigma, which may result in an increase in hidden cases and negatively impact disease control, can be avoided by implementing evidence-based and rights-based approaches.<sup>19</sup> Scientists have emphasized that knowledge about the epidemiology of the disease and awareness of its risks are important ways to prevent transmission and.<sup>7,20</sup> Therefore, to encourage self-reporting, healthcare authorities must ensure confidentiality of confirmed cases and individuals under investigation, and access to health services. Moreover, prompt case finding and information campaigns must be conducted.

Our simulation results strongly emphasize the importance of border control to find the primary case. If the primary case self-reports, then despite having a low self-reporting rate of infectees and contact tracing rate, the situation does not become worse compared to the scenarios where the primary case does not self-report (in Figure 3).

**Conflict of interest**

The authors declare that they have no competing interests.

### **Authors' contributions**

EJ acquired funding for this study. YK, JL, and EJ conceived and designed the study. YK, RM, and VM analyzed the data and wrote the first draft. EJ, JL, and YS gave suggestions on improving the quality of the analysis and monitored the study progress. All authors contributed to the data collection, checking and processing. All authors reviewed the final version of the manuscript. All authors read and approved the final manuscript.

## **Funding**

This paper is supported by the Korea National Research Foundation (NRF) grant funded by the Korean government (MEST) (NRF-2021M3E5E308120711). This paper is also supported by the Korea National Research Foundation (NRF) grant funded by the Korean government (MEST) (NRF-2021R1A2C100448711).

## References

1. Alakunle E, Moens U, Nchinda G, Okeke MI. Monkeypox virus in Nigeria: infection biology, epidemiology, and evolution. *Viruses*. 2020. 12(11). 1257.
2. Guarner J, Johnson BJ, Paddock CD, et al. Veterinary Monkeypox Virus Working Group. Monkeypox transmission and pathogenesis in prairie dogs. *Emerging infectious diseases*. 2004. 10(3):426-31.
3. Ennab F, Nawaz FA, Narain K, et al. Rise of monkeypox: Lessons from COVID-19 pandemic to mitigate global health crises. *Annals of Medicine and Surgery*. 2022. 79:104049.
4. Rizk JG, Lippi G, Henry BM, et al. Prevention and Treatment of Monkeypox. *Drugs*. 2022. 28:1-7.
5. Davido B, D'anglejan E, Jourdan J, et al. Monkeypox 2022 outbreak: cases with exclusive genital lesions. *Journal of Travel Medicine*. 2022. taac077.
6. Breman JG, Steniowski MV, Zanutto E, et al. Human monkeypox, 1970-79. *Bulletin of the World Health Organization*. 1980. 58(2):165.
7. Angelo KM, Petersen BW, Hamer DH, et al. Monkeypox transmission among international travellers—serious monkey business?. *Journal of travel medicine*. 2019. 26(5):taz002.
8. Au NH, Portillo MT, Marwah A, et al. Potential for monkeypox exportation from west and Central Africa through global travel networks. *Journal of Travel Medicine*. 2022. taac072.
9. Zumla A, Valdeiros SR, Haider N, et al. Monkeypox outbreaks outside endemic



- regions: scientific and social priorities. *The Lancet. Infectious Diseases*. 2022. 22(7):929-931.
10. Taylor L. Monkeypox: WHO declares a public health emergency of international concern *BMJ* 2022; 378 :o1874
  11. Edouard M, Fiona S, Saloni D, et al. Monkeypox. 2022. Published online at [OurWorldInData.org](https://ourworldindata.org/monkeypox). Retrieved from: 'https://ourworldindata.org/monkeypox' [Online Resource] .
  12. Grant R, Nguyen LB, Breban R. Modelling human-to-human transmission of monkeypox. *Bulletin of the World Health Organization*. 2020. 98(9):638.
  13. Liu Y, Gayle AA, Wilder-Smith A, Rocklöv J. The reproductive number of COVID-19 is higher compared to SARS coronavirus. *Journal of travel medicine*. 2020. Research Letter.
  14. Bankuru SV, Kossol S, Hou W, et al. A game-theoretic model of Monkeypox to assess vaccination strategies. *PeerJ*. 202. 8:e9272.
  15. Peter OJ, Kumar S, Kumari N, et al. Transmission dynamics of Monkeypox virus: a mathematical modelling approach. *Modeling Earth Systems and Environment*. 2021. 1-2.
  16. Bhunu CP, Mushayabasa S, Hyman JM. Modelling HIV/AIDS and monkeypox co-infection. *Applied Mathematics and Computation*. 2012. 218(18):9504-18.
  17. Han BA, O'Regan SM, Paul Schmidt J, Drake JM. Integrating data mining and transmission theory in the ecology of infectious diseases. *Ecology letters*. 2020. 23(8):1178-88.

18. Tchuente JM, Bauch CT. Can culling to prevent monkeypox infection be counter-productive? Scenarios from a theoretical model. *Journal of Biological Systems*. 2012. 20(03):259-83.
19. UNAIDS warns that stigmatizing language on monkeypox jeopardises public health, May 22, 2022, Available in [https://www.unaids.org/en/resources/presscentre/pressreleaseandstatementarchive/2022/may/20220522\\_PR\\_MONKEYPOX](https://www.unaids.org/en/resources/presscentre/pressreleaseandstatementarchive/2022/may/20220522_PR_MONKEYPOX) (accessed August 1, 2022)
20. Fischer LS, Mansergh G, Lynch J, Santibanez S. Addressing disease-related stigma during infectious disease outbreaks. *Disaster medicine and public health preparedness*. 2019 Dec;13(5-6):989-94.
21. World Health Organization. Surveillance, case investigation and contact tracing for monkeypox: interim guidance, 22 May 2022. World Health Organization; 2022.
22. Giesecke J. Primary and index cases. *The Lancet*. 2014 Dec 6;384(9959):2024.
23. Matthew JK, Pejman R, *Modeling Infectious Diseases in Humans and Animals*. Princeton University Press. 2008. 18.
24. Prem K, Cook AR, Jit M. Projecting social contact matrices in 152 countries using contact surveys and demographic data. *PLoS computational biology*. 2017. 13(9):e1005697.
25. Jezek Z, Marennikova SS, Mutumbo M, et al. Human monkeypox: a study of 2,510 contacts of 214 patients. *Journal of infectious diseases*. 1986. 154(4):551-5.
26. Adler H, Gould S, Hine P, et al. Clinical features and management of human monkeypox: a retrospective observational study in the UK. *The Lancet Infectious*

- Diseases. 2022. 22(8). 1153-1162.
27. Kabuga AI, El Zowalaty ME. A review of the monkeypox virus and a recent outbreak of skin rash disease in Nigeria. *Journal of Medical Virology*. 2019. 91(4):533-40.
  28. Miura F, van Ewijk CE, Backer JA. et al. Estimated incubation period for monkeypox cases confirmed in the Netherlands, May 2022. *Eurosurveillance*. 2022. 27(24):2200448.
  29. Shim E, Choi W, Song Y. Clinical Time Delay Distributions of COVID-19 in 2020–2022 in the Republic of Korea: Inferences from a Nationwide Database Analysis. *Journal of Clinical Medicine*. 2022. 11(12):3269.
  30. Cai X. Exact stochastic simulation of coupled chemical reactions with delays. *The Journal of chemical physics*. 2007. 126(12):124108.
  31. Jang YR, Lee M, Shin H, et al. The first case of monkeypox in the Republic of Korea. *Journal of Korean Medical Science*. 2022. 37(27).

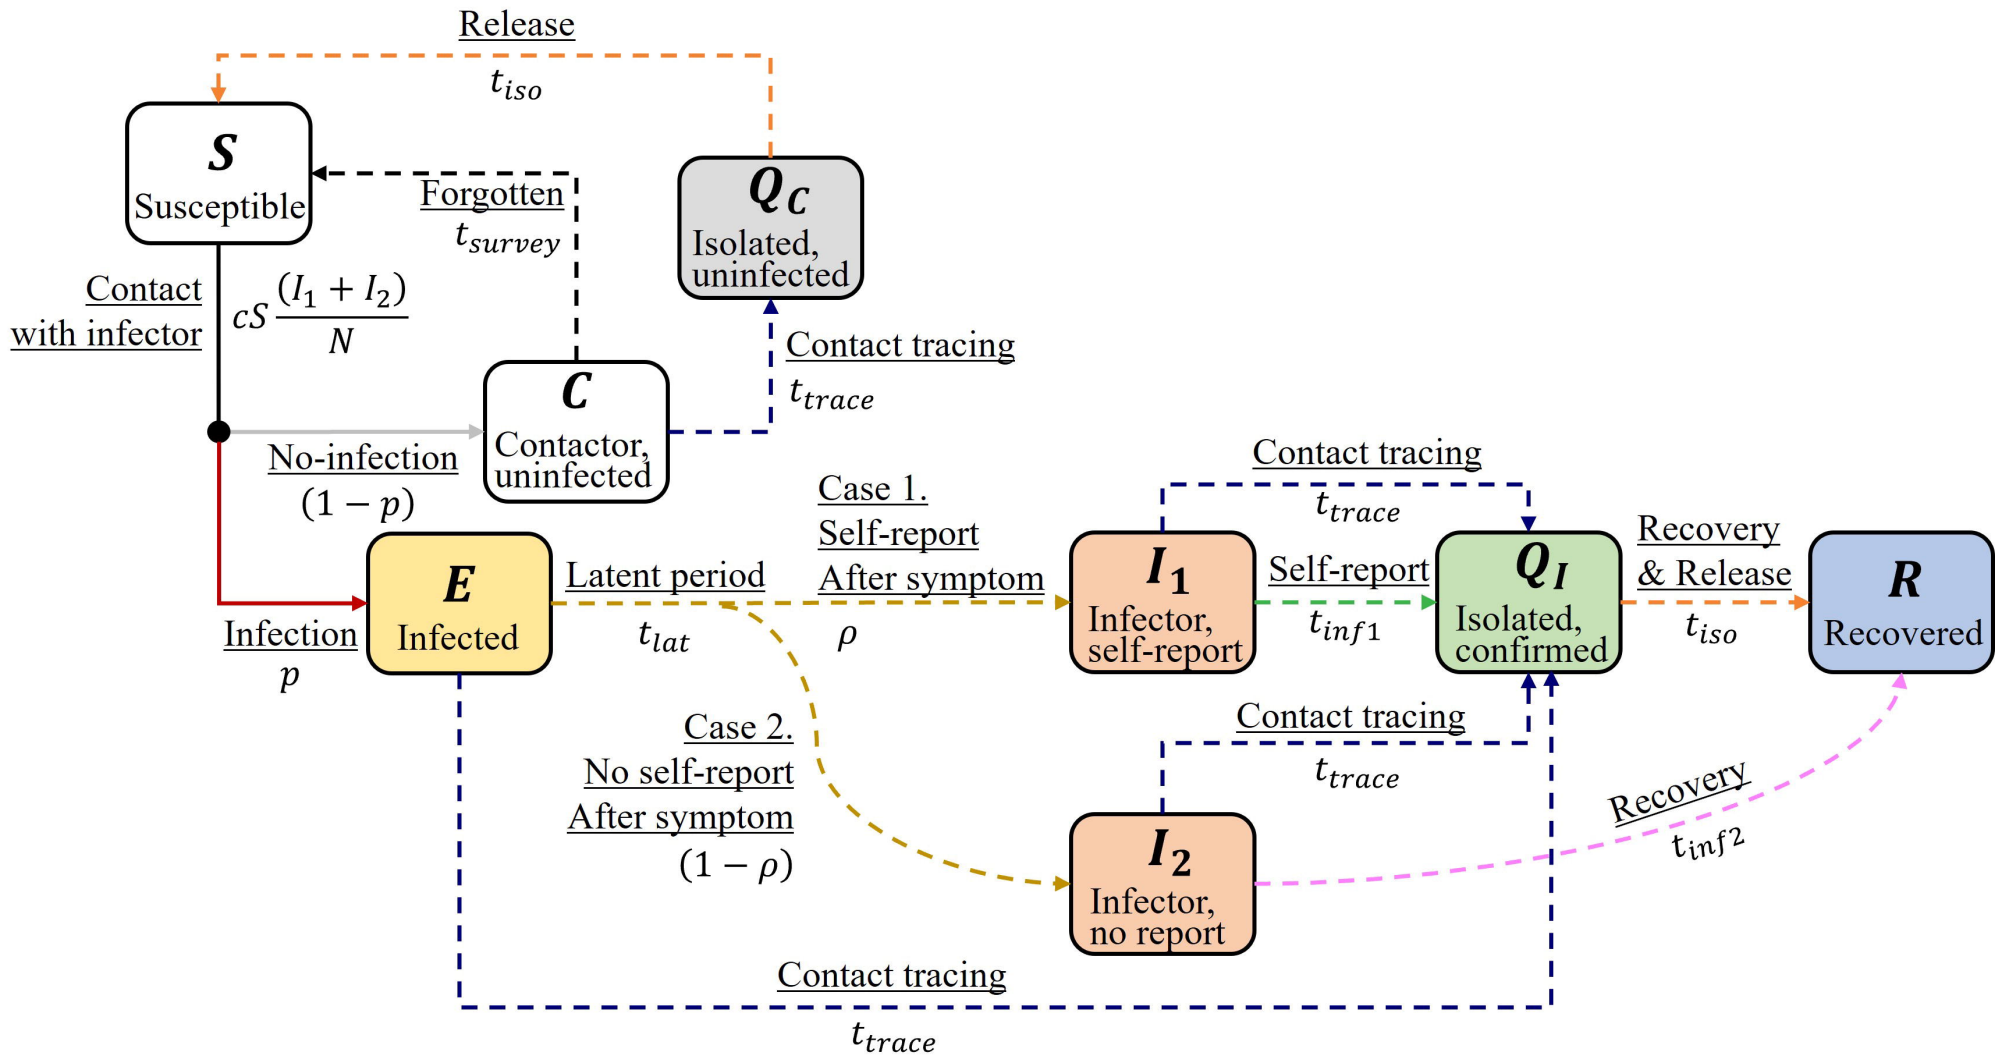

**(A)**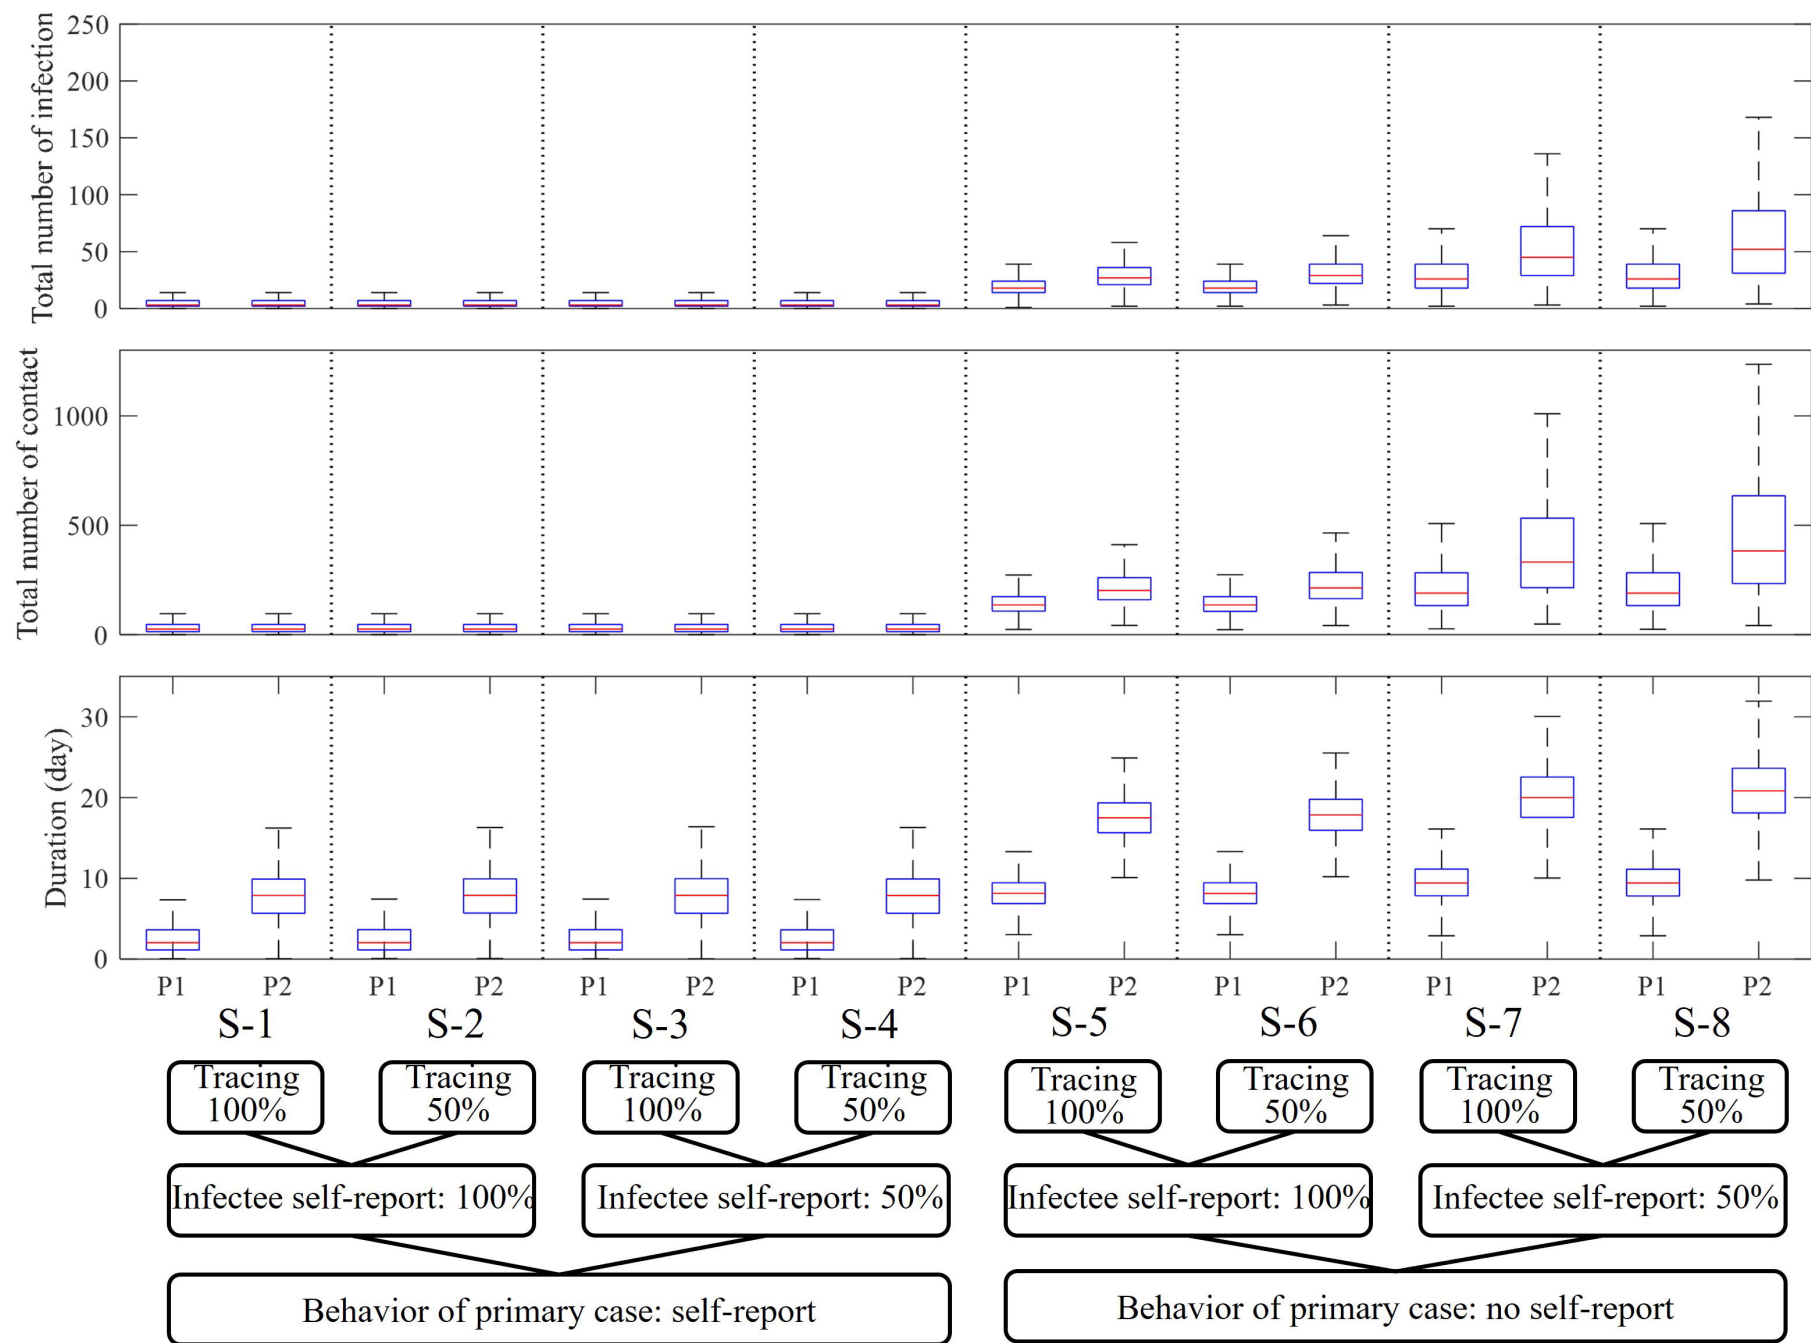**(B)**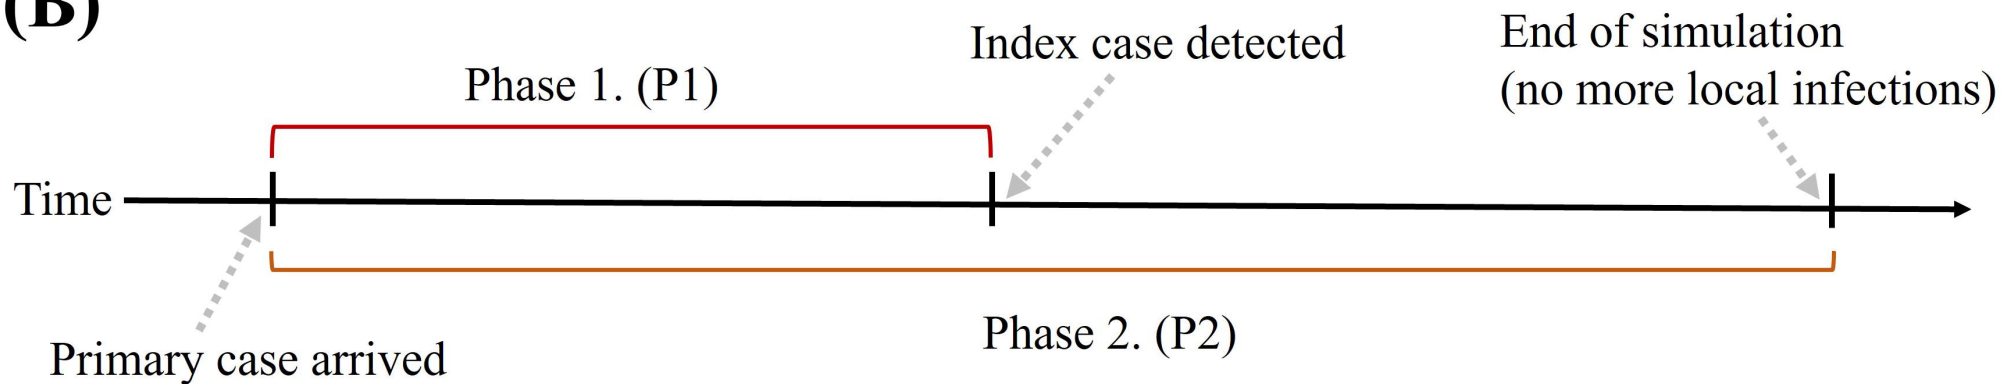

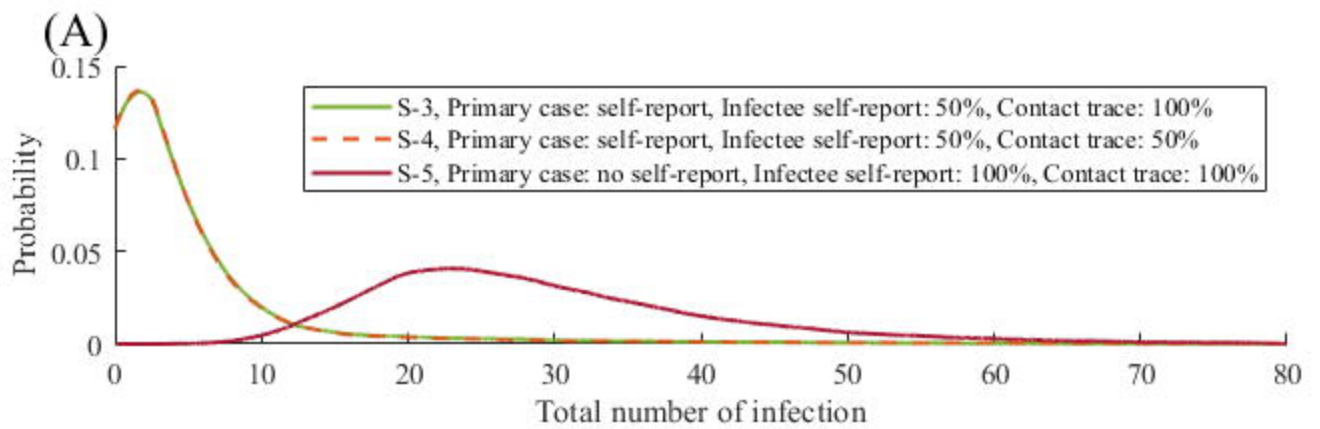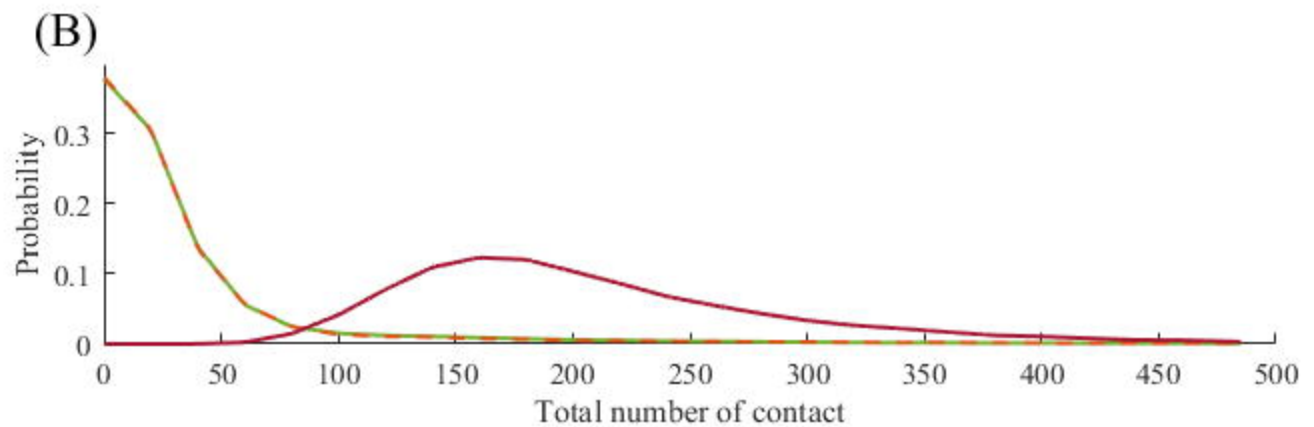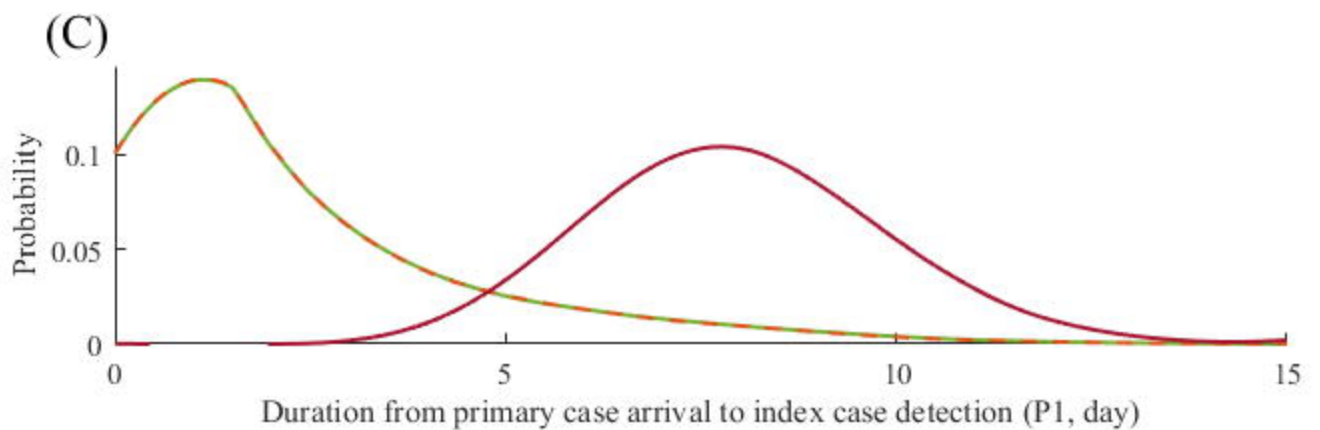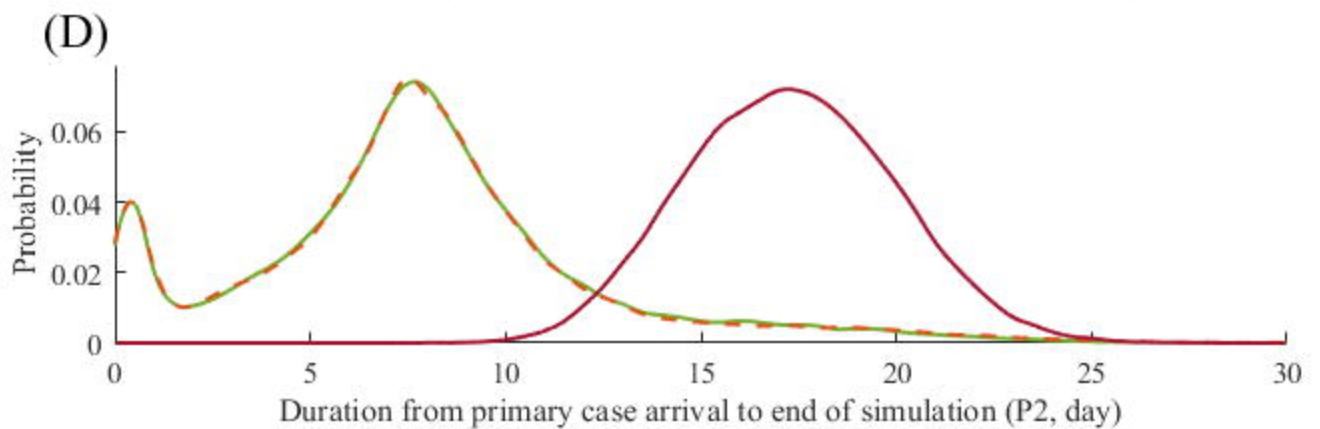

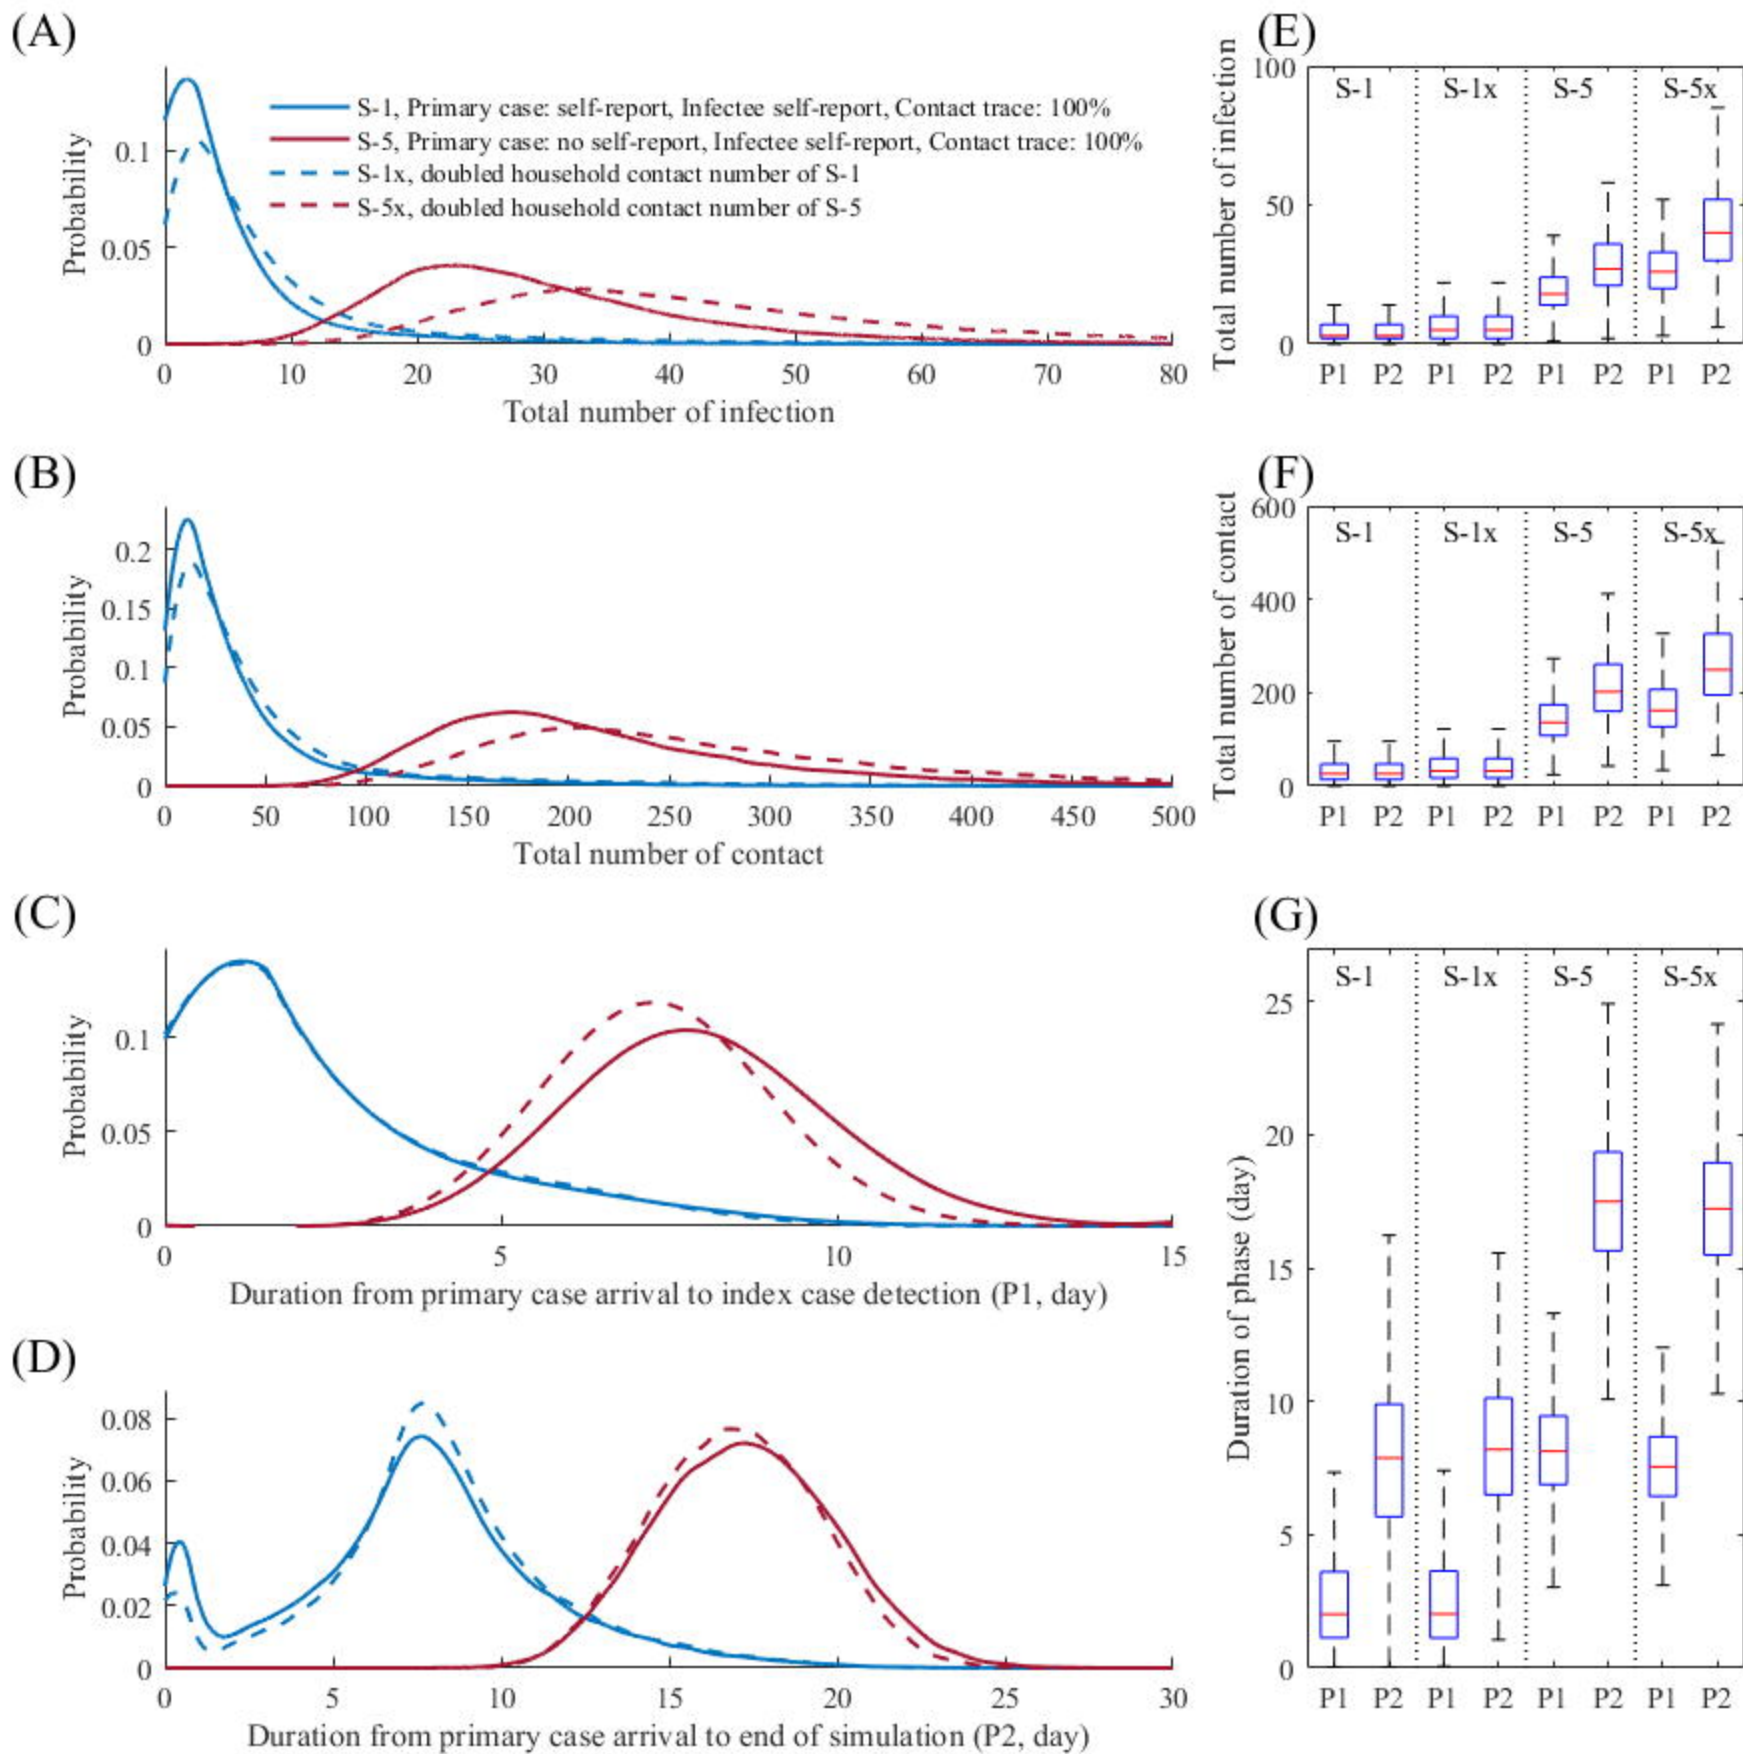

Source: https://www.medrxiv.org/content/medrxiv/early/2022/08/11/2022.08.11.22278654.full.pdf
